# Supplementary material for: The crucial role of oxygen substitution in argyrodite solid electrolytes from the bulk to the surface under atmospheric conditions
Source: Royal Society of Chemistry journal article supplement (doi:10.1039/d2ta03649e), 2022-01-01
Supplement: d2ta03649e1.pdf [file d2ta03649e1.pdf]

Electronic Supporting Information

**Crucial role of oxygen substitution in argyrodite solid electrolytes from bulk to surface  
under atmospheric conditions**

Taesoon Hwang<sup>‡a,c</sup>, You-Jin Lee<sup>‡b</sup>, So Ri Lee<sup>b</sup>, Yoon-Cheol Ha<sup>b</sup>, Maenghyo Cho<sup>c</sup>, Sang-Min Lee<sup>\*b,d</sup> and Kyeongjae Cho<sup>\*a</sup>

<sup>a</sup> *Department of Materials Science and Engineering, University of Texas at Dallas, Richardson, TX 75080, USA. E-mail: kjcho@utdallas.edu.*

<sup>b</sup> *Battery Research Center, Korea Electrotechnology Research Institute, Seongsan-gu, Changwon-si 51543, Korea*

<sup>c</sup> *Department of Mechanical and Aerospace Engineering, Seoul National University, 1 Gwanak-ro, Gwanak-gu, Seoul 08826, Republic of Korea.*

<sup>d</sup> *Graduate Institute of Ferrous & Energy Materials Technology, Pohang University of Science and Technology, 77 Cheongam-Ro, Nam-Gu, Pohang-si 37673, Republic of Korea. E-mail: sangma@postech.ac.kr.*

<sup>‡</sup> *These authors contributed equally.*

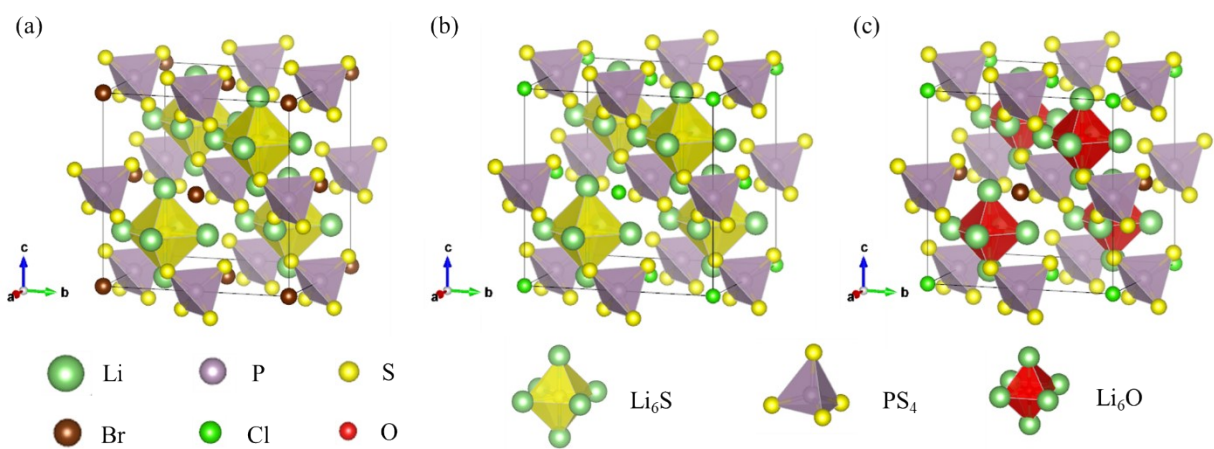

**Fig. S1** Atomic structures of (a) $\text{Li}_6\text{PS}_5\text{Br}$ , (b) $\text{Li}_6\text{PS}_5\text{Cl}$  and (c) $\text{Li}_6\text{POS}_4\text{Br}_{0.5}\text{Cl}_{0.5}$ .

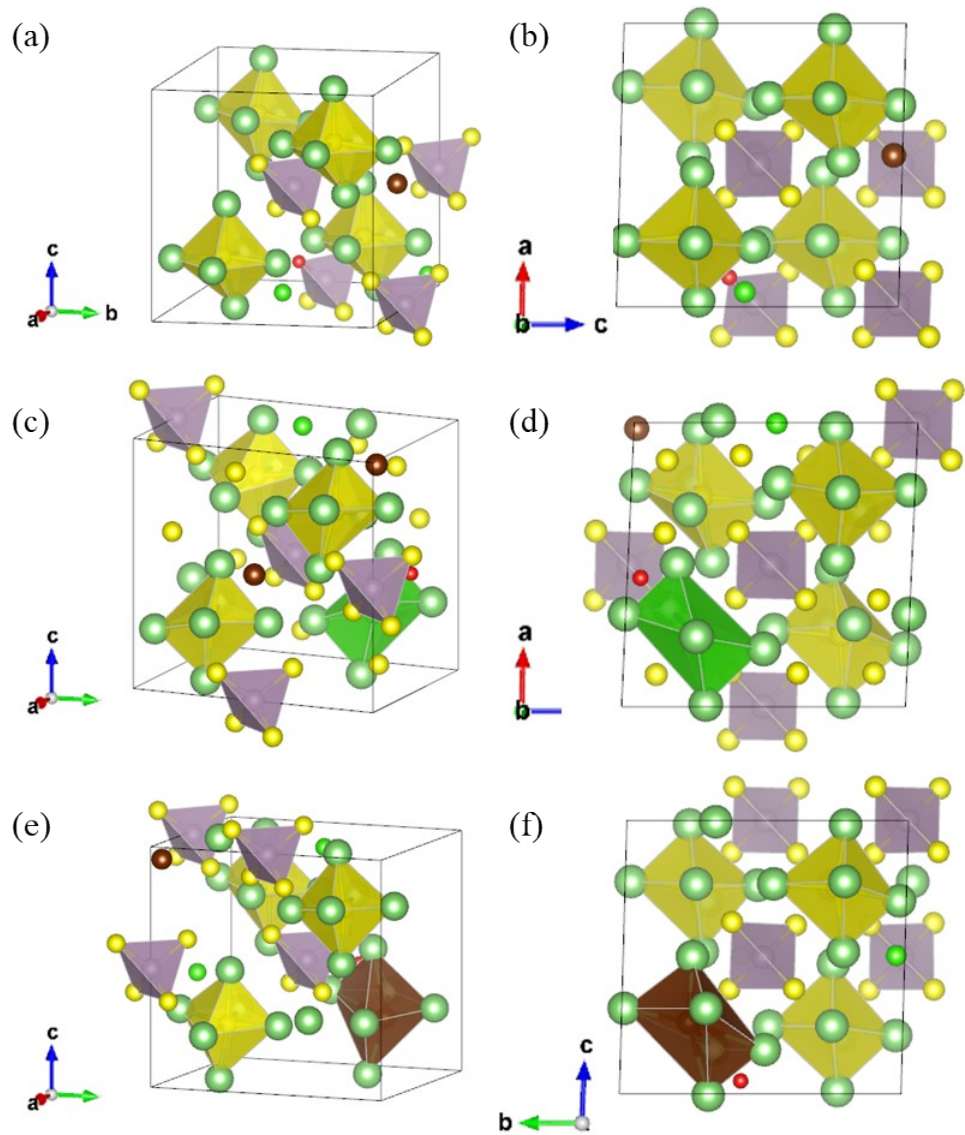

**Fig. S2** Atomic structures of (a,b)16e site  $\text{Li}_6\text{PO}_{0.25}\text{S}_{4.75}\text{Br}_{0.5}\text{Cl}_{0.5}$  (c,d for Cl and e,f for Br) 4a site inverted  $\text{Li}_6\text{PO}_{0.25}\text{S}_{4.75}\text{Br}_{0.5}\text{Cl}_{0.5}$ .

**Table. S1** Lattice constants of (a,b)16e site  $\text{Li}_6\text{PO}_{0.25}\text{S}_{4.75}\text{Br}_{0.5}\text{Cl}_{0.5}$  (c,d for Cl and e,f for Br) 4a site inversed  $\text{Li}_6\text{PO}_{0.25}\text{S}_{4.75}\text{Br}_{0.5}\text{Cl}_{0.5}$ .

|                                                                                                  | <i>a</i> | <i>b</i> | <i>c</i> | alpha | beta  | gamma |
|--------------------------------------------------------------------------------------------------|----------|----------|----------|-------|-------|-------|
| 16e site $\text{Li}_6\text{PO}_{0.25}\text{S}_{4.75}\text{Br}_{0.5}\text{Cl}_{0.5}$              | 10.17    | 10.17    | 10.23    | 88.50 | 91.51 | 88.14 |
| Cl - 4a site inversed $\text{Li}_6\text{PO}_{0.25}\text{S}_{4.75}\text{Br}_{0.5}\text{Cl}_{0.5}$ | 10.08    | 10.39    | 10.39    | 90.21 | 88.42 | 91.58 |
| Br - 4a site inversed $\text{Li}_6\text{PO}_{0.25}\text{S}_{4.75}\text{Br}_{0.5}\text{Cl}_{0.5}$ | 10.51    | 10.08    | 10.08    | 92.55 | 90.37 | 90.37 |

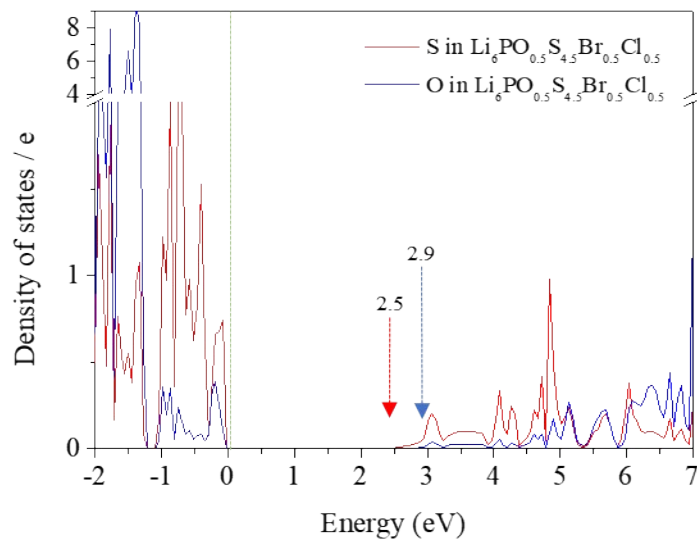

**Fig. S3** Density of states for S and O in  $\text{Li}_6\text{PO}_{0.5}\text{S}_{4.5}\text{Br}_{0.5}\text{Cl}_{0.5}$ . (Dotted arrows are band gaps).

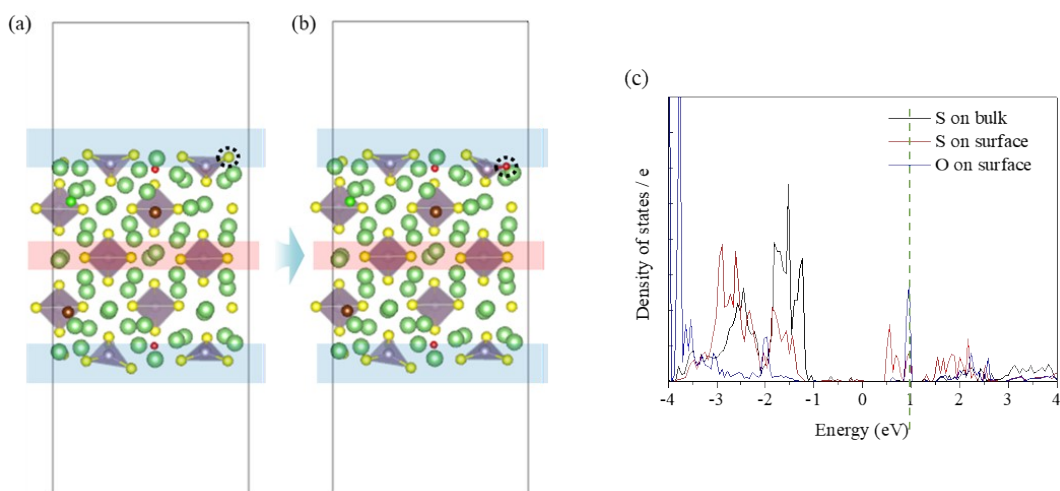

**Fig. S4** Atomic structures before and after the exchange between S and O in (a, b)  $\text{Li}_6\text{PO}_{0.5}\text{S}_{4.5}\text{Br}_{0.5}\text{Cl}_{0.5}$ ; PDOSs of the exchanged S, O on the surface and S in the bulk for (c)  $\text{Li}_6\text{PO}_{0.5}\text{S}_{4.5}\text{Br}_{0.5}\text{Cl}_{0.5}$ . (blue shaded areas : surfaces, red shaded area : bulk, black dotted circle : exchanged elements).

**Table S2.** Average net charges of S and O at the surface before the exchange.

|                                                                          | S on 4d | S on 16e | O on 4d | p     |
|--------------------------------------------------------------------------|---------|----------|---------|-------|
| $\text{Li}_6\text{PS}_5\text{Br}_{0.5}\text{Cl}_{0.5}$                   | -1.65   | -0.80    | X       | 1.239 |
| $\text{Li}_6\text{PO}_{0.5}\text{S}_{4.5}\text{Br}_{0.5}\text{Cl}_{0.5}$ | -1.63   | -0.73    | -1.69   | 1.25  |
| $\text{Li}_6\text{POS}_5\text{Br}_{0.5}\text{Cl}_{0.5}$                  | X       | -0.72    | -1.69   | 1.25  |

**Table S3.** Average net charges of S and O at the surface After the exchange.

|                                                                          | S on 4d | S on 16e | Exchanged O | O on 4d | P    |
|--------------------------------------------------------------------------|---------|----------|-------------|---------|------|
| $\text{Li}_6\text{PS}_5\text{Br}_{0.5}\text{Cl}_{0.5}$                   | -1.65   | -0.77    | -1.51       | X       | 1.42 |
| $\text{Li}_6\text{PO}_{0.5}\text{S}_{4.5}\text{Br}_{0.5}\text{Cl}_{0.5}$ | -1.64   | -0.74    | -1.46       | -1.69   | 1.44 |
| $\text{Li}_6\text{POS}_5\text{Br}_{0.5}\text{Cl}_{0.5}$                  | X       | -0.72    | -1.42       | -1.69   | 1.42 |

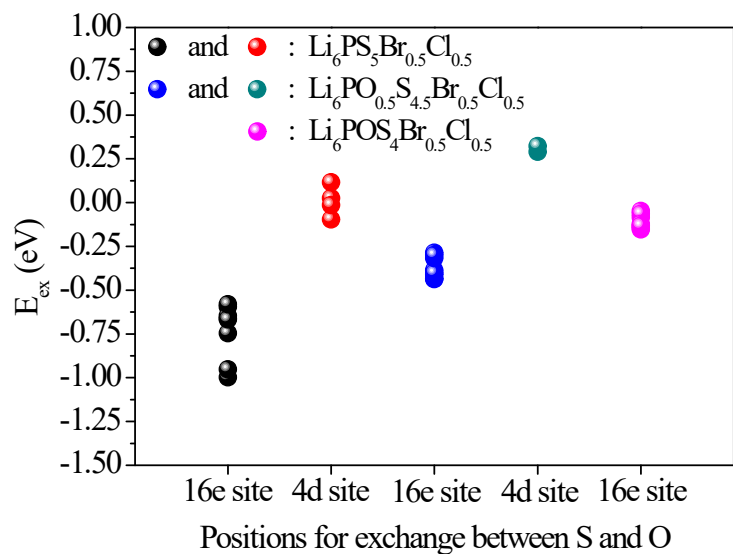

**Fig. S5** Exchange energy between S and O depending on the positions in  $\text{Li}_6\text{PS}_5\text{Br}_{0.5}\text{Cl}_{0.5}$ ,  $\text{Li}_6\text{PO}_{0.5}\text{S}_{4.5}\text{Br}_{0.5}\text{Cl}_{0.5}$  and  $\text{Li}_6\text{POS}_4\text{Br}_{0.5}\text{Cl}_{0.5}$ .

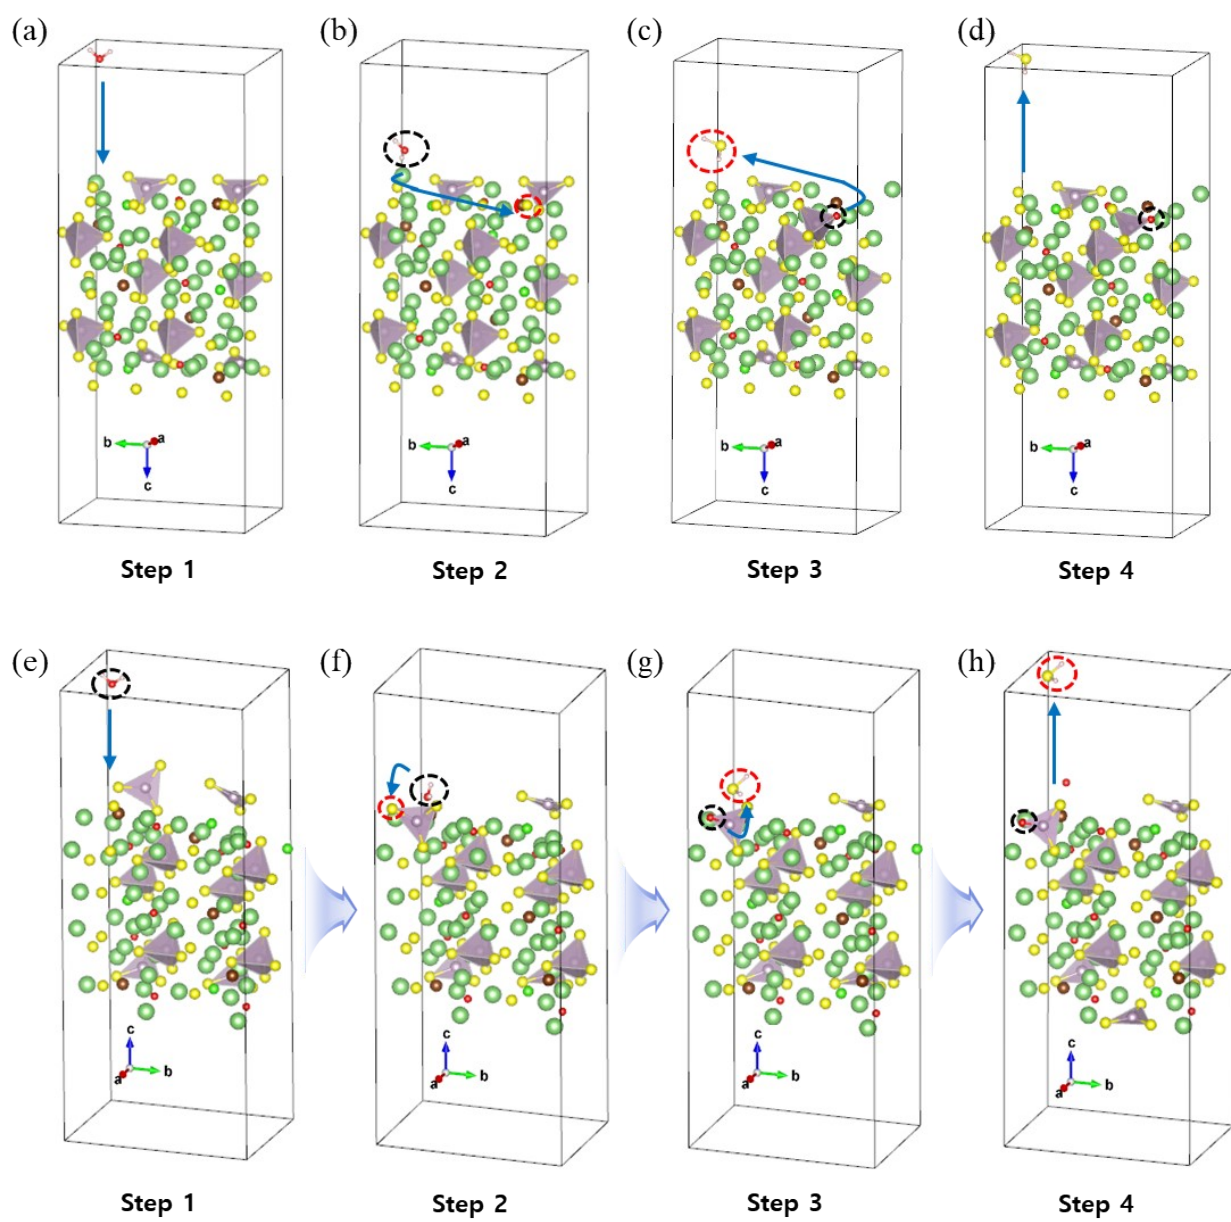

**Fig. S6** Atomic structures of (a-d)  $\text{Li}_6\text{PO}_3\text{S}_{4.5}\text{Br}_{0.5}\text{Cl}_{0.5}$  and (e-h)  $\text{Li}_6\text{PO}_3\text{S}_5\text{Br}_{0.5}\text{Cl}_{0.5}$  of reaction steps from  $\text{H}_2\text{O}$  to  $\text{H}_2\text{S}$



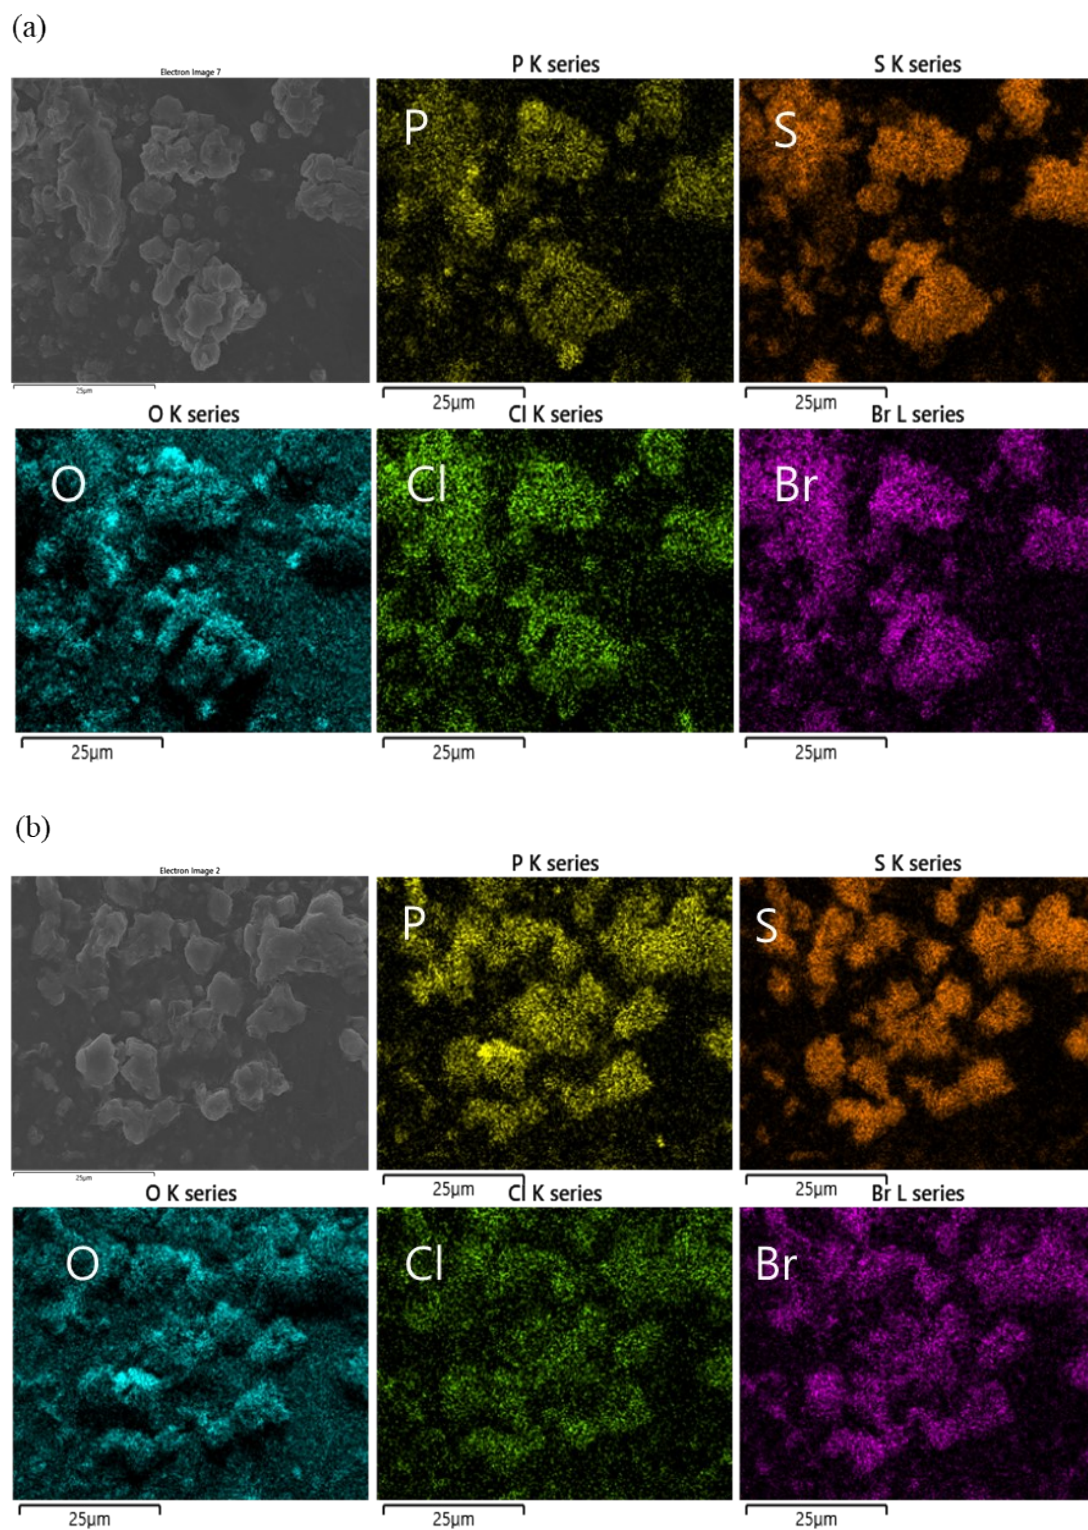

**Fig. S7** Morphology and distributions of constituents in (a)  $\text{Li}_6\text{PS}_5\text{Br}_{0.5}\text{Cl}_{0.5}$  and (b)  $\text{Li}_6\text{PO}_{0.5}\text{S}_{4.5}\text{Br}_{0.5}\text{Cl}_{0.5}$ .

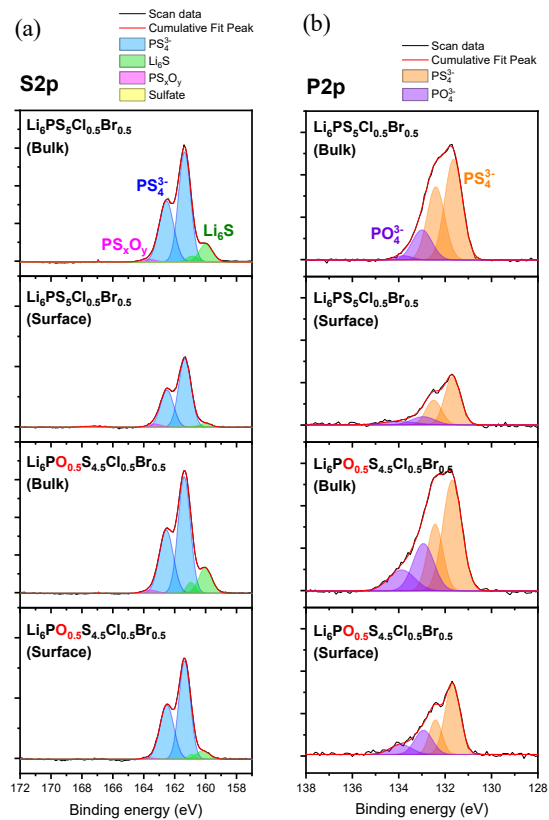

**Fig. S8** (a)S2p and (b)P2p XPS spectra of  $\text{Li}_6\text{PS}_5\text{Br}_{0.5}\text{Cl}_{0.5}$  and  $\text{Li}_6\text{PO}_{0.5}\text{S}_{4.5}\text{Br}_{0.5}\text{Cl}_{0.5}$  solid electrolytes after exposure to dry air.
